# Supplementary material for: System Complexity in Influenza Infection and Vaccination: Effects upon Excess Winter Mortality
Source: MDPI journal article supplement (doi:10.3390/idr14030035), 2022-04-21
Supplement: s1 [file s1]

---

## Supplementary material

**Table S1.** Relationship between the obesity factor and the resulting correlation between All Country slope and Obesity adjusted slope

| Obesity     |               |               |
|-------------|---------------|---------------|
| Factor      | R-squared     | Slope         |
| 0.30        | 0.9622        | 0.9449        |
| 0.20        | 0.9791        | 0.9751        |
| 0.15        | 0.9798        | 0.9815        |
| <b>0.12</b> | <b>0.9799</b> | <b>0.9855</b> |
| 0.10        | 0.9798        | 0.9880        |
| 0.07        | 0.9793        | 0.9919        |
| 0.05        | 0.9789        | 0.9945        |
| 0.02        | 0.9780        | 0.9984        |

Table S2 next page .....

**Table S2.** Summary of data used in the study including influenza vaccine doses distributed and proportion aged 65+ vaccinated versus adjusted EWM. Count = number of countries with available data. The slope from vaccine doses distributed is raw and adjusted using the relationship in Figure 7. The slope for the “Obesity adjusted” data uses an assumed 0.12% increase in EWM per 1% increase in adult obesity. This slope is then adjusted down by 0.37% to account for the change in intercept arising from the obesity adjustment. The “All variance” column gives the variance associated with the “All countries” data using the age 65+ vaccinated data. STDEV = standard deviation of the average slope. Before 1987/88 the maximum age 65+ vaccinated was not available. The low median for age 65+ vaccinated prior to 1996/97 is due to increasing numbers of countries with zero or low vaccination rates. The average value of the slope and STDEV are calculated from the adjusted slope from doses distributed plus age 65+ data covering All, +US states, and Obesity adjusted. The STDEV of the average slope tends to decline as the slope gets higher, -0.0377 for every percent increase in the slope. However, the R-squared is only 0.183 indicating that average slope only explains 18.3% of the variance in STDEV.

| Year    | Age 65+ vaccinated |          | Count               |             |                | Intercept |        |             |                   | Slope (doses distributed) |          | Slope (age 65+ vaccinated) |        |             |                   | All Variance | Slope    |       |
|---------|--------------------|----------|---------------------|-------------|----------------|-----------|--------|-------------|-------------------|---------------------------|----------|----------------------------|--------|-------------|-------------------|--------------|----------|-------|
|         | Me-dian            | Maxi-mum | Doses Dis-trib-uted | Age 65+ All | Age 65+ Top 50 | All       | Top 50 | + US states | Obesity ad-justed | Raw                       | Adjusted | All                        | Top 50 | + US states | Obesity ad-justed |              | Aver-age | STDEV |
| 1980/81 |                    |          | 34                  |             |                |           |        |             |                   | -2%                       | -1.0%    |                            |        |             |                   |              | -1.0%    | n/a   |
| 1981/82 |                    |          | 41                  |             |                |           |        |             |                   | -6%                       | -2.8%    |                            |        |             |                   |              | -2.8%    | n/a   |
| 1982/83 |                    |          | 40                  |             |                |           |        |             |                   | 6%                        | 2.9%     |                            |        |             |                   |              | 2.9%     | n/a   |
| 1983/84 |                    |          | 41                  |             |                |           |        |             |                   | -3%                       | -1.5%    |                            |        |             |                   |              | -1.5%    | n/a   |
| 1984/85 |                    |          | 35                  |             |                |           |        |             |                   | -9%                       | -4.4%    |                            |        |             |                   |              | -4.4%    | n/a   |
| 1985/86 |                    |          | 42                  |             |                |           |        |             |                   | 10%                       | 4.9%     |                            |        |             |                   |              | 4.9%     | n/a   |
| 1986/87 |                    |          | 39                  |             |                |           |        |             |                   | -2%                       | -1.0%    |                            |        |             |                   |              | -1.0%    | n/a   |
| 1987/88 | 3%                 | 44%      | 41                  | 50          | 37             | 11.1%     | 11.2%  |             | 12.2%             | -8%                       | -3.9%    | -4.3%                      | -4.7%  |             | -4.9%             | 0.09%        | -4.4%    | 0.5%  |
| 1988/89 | 4%                 | 45%      | 41                  | 51          | 39             | 11.2%     | 10.6%  |             | 12.1%             | -10%                      | -4.9%    | -6.0%                      | -3.6%  |             | -6.0%             | 0.09%        | -5.6%    | 0.6%  |
| 1989/90 | 1%                 | 49%      | 53                  | 53          | 40             | 13.7%     | 14.0%  |             | 15.0%             | -2%                       | -1.0%    | -2.2%                      | -3.1%  |             | -3.1%             | 0.09%        | -2.1%    | 1.1%  |
| 1990/91 | 1%                 | 58%      | 54                  | 59          | 43             | 12.0%     | 11.0%  |             | 12.9%             | -4%                       | -2.0%    | -3.8%                      | -0.9%  |             | -3.7%             | 0.09%        | -3.1%    | 1.0%  |
| 1991/92 | 2%                 | 59%      | 57                  | 60          | 48             | 12.0%     | 11.7%  |             | 13.3%             | -9%                       | -4.4%    | -3.0%                      | -2.0%  |             | -3.5%             | 0.06%        | -3.7%    | 0.7%  |
| 1992/93 | 4%                 | 59%      | 56                  | 58          | 46             | 13.1%     | 13.6%  |             | 14.4%             | -6%                       | -3.0%    | -1.5%                      | -3.0%  |             | -3.7%             | 0.09%        | -2.7%    | 1.1%  |
| 1993/94 | 5%                 | 59%      | 60                  | 61          | 49             | 13.2%     | 12.6%  |             | 14.8%             | -3%                       | -1.5%    | -1.2%                      | 0.6%   |             | -2.5%             | 0.12%        | -1.7%    | 0.7%  |
| 1994/95 | 6%                 | 62%      | 58                  | 60          | 46             | 11.7%     | 11.3%  |             | 13.2%             | -10%                      | -4.9%    | -3.3%                      | -2.7%  |             | -4.1%             | 0.11%        | -4.1%    | 0.8%  |
| 1995/96 | 6%                 | 66%      | 47                  | 53          | 40             | 13.5%     | 12.6%  |             | 15.3%             | 0%                        | 0.0%     | 0.2%                       | 2.2%   |             | -1.0%             | 0.15%        | -0.3%    | 0.7%  |
| 1996/97 | 7%                 | 68%      | 52                  | 62          | 47             | 13.4%     | 13.0%  |             | 15.1%             | 5%                        | 2.4%     | 2.1%                       | 3.2%   |             | 1.4%              | 0.08%        | 2.0%     | 0.5%  |

| Year    | Age 65+ vaccinated |         | Count             |             |                | Intercept |        |             |                  | Slope (doses distributed) |          | Slope (age 65+ vaccinated) |        |             |                  | All Variance | Slope   |       |
|---------|--------------------|---------|-------------------|-------------|----------------|-----------|--------|-------------|------------------|---------------------------|----------|----------------------------|--------|-------------|------------------|--------------|---------|-------|
|         | Median             | Maximum | Doses Distributed | Age 65+ All | Age 65+ Top 50 | All       | Top 50 | + US states | Obesity adjusted | Raw                       | Adjusted | All                        | Top 50 | + US states | Obesity adjusted |              | Average | STDEV |
| 1997/98 | 8%                 | 70%     | 52                | 57          | 46             | 10.8%     | 10.2%  |             | 12.6%            | 6%                        | 3.0%     | 3.4%                       | 4.4%   |             | 2.6%             | 0.13%        | 3.0%    | 0.4%  |
| 1998/99 | 9%                 | 70%     | 48                | 58          | 47             | 13.0%     | 13.5%  |             | 14.7%            | 12%                       | 5.9%     | 5.9%                       | 5.0%   |             | 5.7%             | 0.17%        | 5.9%    | 0.1%  |
| 1999/00 | 11%                | 76%     | 59                | 66          | 47             | 15.0%     | 15.5%  |             | 17.1%            | 5%                        | 2.5%     | 3.6%                       | 2.4%   |             | 2.6%             | 0.14%        | 2.9%    | 0.6%  |
| 2000/01 | 17%                | 76%     | 59                | 68          | 47             | 11.6%     | 11.3%  |             | 13.4%            | -6%                       | -3.0%    | -5.2%                      | -4.4%  |             | -5.2%            | 0.11%        | -4.4%   | 1.3%  |
| 2001/02 | 18%                | 78%     | 63                | 73          | 46             | 11.8%     | 10.6%  |             | 14.2%            | -6%                       | -3.0%    | -2.4%                      | -0.2%  |             | -3.6%            | 0.11%        | -3.0%   | 0.6%  |
| 2002/03 | 21%                | 78%     | 67                | 74          | 49             | 13.1%     | 12.8%  |             | 15.0%            | -8%                       | -3.9%    | -2.6%                      | -1.7%  |             | -2.7%            | 0.15%        | -3.1%   | 0.7%  |
| 2003/04 | 20%                | 77%     | 64                | 76          | 46             | 13.9%     | 13.8%  |             | 16.2%            | -11%                      | -5.4%    | -5.9%                      | -6.2%  |             | -6.7%            | 0.12%        | -6.0%   | 0.6%  |
| 2004/05 | 24%                | 82%     | 67                | 74          | 46             | 14.4%     | 14.6%  |             | 16.7%            | 5%                        | 2.5%     | 1.5%                       | 1.4%   |             | -0.2%            | 0.10%        | 1.2%    | 1.4%  |
| 2005/06 | 25%                | 84%     | 69                | 79          | 48             | 11.9%     | 12.7%  |             | 14.1%            | -3%                       | -1.5%    | -2.9%                      | -4.4%  |             | -3.4%            | 0.13%        | -2.6%   | 1.0%  |
| 2006/07 | 24%                | 82%     | 70                | 83          | 50             | 12.1%     | 11.6%  |             | 14.4%            | -6%                       | -3.0%    | -3.1%                      | -2.9%  |             | -3.7%            | 0.11%        | -3.3%   | 0.4%  |
| 2007/08 | 25%                | 81%     | 73                | 80          | 48             | 12.0%     | 11.3%  | 11.4%       | 13.9%            | -1%                       | -0.5%    | -0.4%                      | 0.9%   | -0.1%       | -0.4%            | 0.11%        | -0.3%   | 0.2%  |
| 2008/09 | 30%                | 83%     | 69                | 76          | 48             | 11.0%     | 10.4%  | 11.6%       | 13.1%            | 6%                        | 3.0%     | 4.0%                       | 5.4%   | 3.3%        | 4.0%             | 0.13%        | 3.6%    | 0.5%  |
| 2009/10 | 27%                | 88%     | 71                | 73          | 45             | 10.6%     | 10.7%  | 10.7%       | 13.1%            | -1%                       | -0.5%    | 0.3%                       | 0.1%   | -0.1%       | -0.3%            | 0.06%        | -0.2%   | 0.3%  |
| 2010/11 | 25%                | 81%     | 69                | 77          | 48             | 9.5%      | 8.6%   | 9.1%        | 11.9%            | 3%                        | 1.5%     | 2.6%                       | 3.6%   | 2.7%        | 2.3%             | 0.07%        | 2.3%    | 0.6%  |
| 2011/12 | 25%                | 80%     | 71                | 80          | 49             | 12.4%     | 12.5%  | 13.4%       | 15.1%            | 4%                        | 2.0%     | 0.6%                       | 0.4%   | -0.6%       | 0.1%             | 0.17%        | 0.5%    | 1.1%  |
| 2012/13 | 26%                | 80%     | 71                | 84          | 50             | 10.9%     | 13.0%  | 10.3%       | 14.1%            | 6%                        | 3.0%     | 3.8%                       | 0.4%   | 4.5%        | 2.3%             | 0.19%        | 3.4%    | 1.0%  |
| 2013/14 | 25%                | 81%     | 74                | 85          | 50             | 12.6%     | 11.2%  | 12.1%       | 15.3%            | -4%                       | -2.0%    | -4.5%                      | -3.3%  | -3.8%       | -5.3%            | 0.16%        | -3.9%   | 1.4%  |
| 2014/15 | 25%                | 84%     |                   | 85          | 49             | 13.0%     | 14.7%  | 13.4%       | 15.7%            |                           |          | 7.8%                       | 5.5%   | 7.7%        | 7.0%             | 0.23%        | 7.5%    | 0.5%  |
| 2015/16 | 26%                | 84%     |                   | 81          | 45             | 9.8%      | 10.2%  | 10.4%       | 12.7%            |                           |          | 2.4%                       | 1.1%   | 1.8%        | 1.5%             | 0.11%        | 1.9%    | 0.5%  |
| 2016/17 | 27%                | 85%     |                   | 79          | 45             | 16.7%     | 18.6%  | 16.6%       | 19.8%            |                           |          | -3.4%                      | -6.5%  | -3.5%       | -4.6%            | 0.22%        | -3.8%   | 0.7%  |
| 2017/18 | 24%                | 97%     |                   | 80          | 45             | 11.9%     | 14.8%  | 12.6%       | 14.7%            |                           |          | 7.8%                       | 4.5%   | 7.2%        | 7.2%             | 0.19%        | 7.4%    | 0.4%  |
| 2018/19 | 30%                | 97%     |                   | 75          | 46             | 12.7%     | 15.0%  | 13.0%       | 16.1%            |                           |          | -1.4%                      | -6.2%  | -1.4%       | -2.8%            | 0.11%        | -1.8%   | 0.8%  |
| 2019/20 | 36%                | 86%     |                   | 66          | 45             | 9.6%      | 9.2%   | 10.0%       | 9.9%             |                           |          | 3.9%                       | 4.5%   | 3.9%        | 3.2%             | 0.11%        | 3.7%    | 0.4%  |
